# Supplementary material for: Therapeutic Effects of Catechins in Less Common Neurological and Neurodegenerative Disorders
Source: MDPI journal article supplement (doi:10.3390/nu13072232), 2021-06-29
Supplement: s1 [file s1]

## Supplemental Material S1

### Search methodology

**Section 3.1.** Search: (((("catechin"[MeSH Terms] OR "catechin"[All Fields] OR "catechins"[All Fields] OR "catechine"[All Fields] OR "catechines"[All Fields]) NOT ("polyphenol s"[All Fields] OR "polyphenols"[All Fields] OR "polyphenolic"[All Fields] OR "polyphenolics"[All Fields] OR "polyphenols"[MeSH Terms] OR "polyphenols"[All Fields] OR "polyphenol"[All Fields])) AND ("antioxidant s"[All Fields] OR "antioxidants"[Pharmacological Action] OR "antioxidants"[MeSH Terms] OR "antioxidants"[All Fields] OR "antioxidant"[All Fields] OR "antioxidating"[All Fields] OR "antioxidation"[All Fields] OR "antioxidative"[All Fields] OR "antioxidatively"[All Fields] OR "antioxidatives"[All Fields] OR "antioxidizing"[All Fields] OR ("anti inflammatory agents"[Pharmacological Action] OR "anti inflammatory agents"[MeSH Terms] OR ("anti inflammatory"[All Fields] AND "agents"[All Fields]) OR "anti inflammatory agents"[All Fields] OR "antiinflammatories"[All Fields] OR "antiinflammatory"[All Fields])) AND ("neurodegenerative"[All Fields] OR "neurodegeneratives"[All Fields])) AND (2010:2021[pdat]). Filters: Article types: classical article, clinical study, clinical trial, comparative study, controlled clinical trial, journal article, multicenter study, observational study, randomized con-trolled trial. Publication dates: 2010-2021(included); Species: humans, mouse, rat; Languages: English.

Search: ("autophagies"[All Fields] OR "autophagy"[MeSH Terms] OR "autophagy"[All Fields] OR "autophagy s"[All Fields]) AND ("catechin"[MeSH Terms] OR "catechin"[All Fields] OR "catechins"[All Fields] OR "catechine"[All Fields] OR "catechines"[All Fields]) AND ("neuron s"[All Fields] OR "neuronal"[All Fields] OR "neuronally"[All Fields] OR "neuronal s"[All Fields] OR "neurone s"[All Fields] OR "neurones"[All Fields] OR "neuronic"[All Fields] OR "neurons"[MeSH Terms] OR "neurons"[All Fields] OR "neuron"[All Fields] OR "neurone"[All Fields] OR ("neurodegenerative"[All Fields] OR "neurodegeneratives"[All Fields])). Filters: Article types: classical article, clinical study, clinical trial, comparative study, controlled clinical trial, journal article, multicenter study, observational study, randomized con-trolled trial. Publication dates: 2010-2021(included); Species: humans, mouse, rat; Languages: English.

Search: ("autophagies"[All Fields] OR "autophagy"[MeSH Terms] OR "autophagy"[All Fields] OR "autophagy s"[All Fields]) AND ("catechin"[MeSH Terms] OR "catechin"[All Fields] OR "catechins"[All Fields] OR "catechine"[All Fields] OR "catechines"[All Fields]) AND ("neuron s"[All Fields] OR "neuronal"[All Fields] OR "neuronally"[All Fields] OR "neuronal s"[All Fields] OR "neurone s"[All Fields] OR "neurones"[All Fields] OR "neuronic"[All Fields] OR "neurons"[MeSH Terms] OR "neurons"[All Fields] OR "neuron"[All Fields] OR "neurone"[All Fields] OR ("neurodegenerative"[All Fields] OR "neurodegeneratives"[All Fields])). Filters: Article types: classical article, clinical study, clinical trial, comparative study, controlled clinical trial, journal article, multicenter study, observational study, randomized con-trolled trial. Publication dates: 2010-2021(included); Species: humans, mouse, rat; Languages: English.

Search: ("catechin"[MeSH Terms] OR "catechin"[All Fields] OR "catechins"[All Fields] OR "catechine"[All Fields] OR "catechines"[All Fields]) AND "DYRK1A"[All Fields]. Filters: Article types: classical article, clinical study, clinical trial, comparative study, controlled clinical trial, journal article, multicenter study, observational study, randomized con-trolled trial. Publication dates: 2010-2021(included); Species: humans, mouse, rat; Languages: English.

**Section 3.2.** Search: ("epigallocatechin gallate"[Supplementary Concept] OR "epigallocatechin gallate"[All Fields] OR ("tea"[MeSH Terms] OR "tea"[All Fields] OR ("green"[All Fields] AND "tea"[All Fields]) OR "green tea"[All Fields])) AND ("huntington disease"[MeSH Terms] OR ("huntington"[All Fields] AND "disease"[All Fields]) OR "huntington disease"[All Fields]). Filters: Article types: classical article, clinical study,

clinical trial, comparative study, controlled clinical trial, journal article, multicenter study, observational study, randomized controlled trial. Publication dates: 2010-2021(included); Species: humans, mouse, rat; Languages: English.

Search: ("multiple sclerosis"[MeSH Terms] OR ("multiple"[All Fields] AND "sclerosis"[All Fields]) OR "multiple sclerosis"[All Fields]); (catechin: "catechin"[MeSH Terms] OR "catechin"[All Fields] OR "catechins"[All Fields] OR "catechine"[All Fields] OR "catechines"[All Fields]). Filters: Article types: classical article, clinical study, clinical trial, comparative study, controlled clinical trial, journal article, multicenter study, observational study, randomized controlled trial; Publication dates: 2010-2021(included); Species: humans, mouse, rat; Languages: English.

**Section 3.3.** Search: ("Fetal Alcohol Spectrum Disorders"[Mesh]) AND "Catechin"[Mesh]: 1 result (((("Fetal Alcohol Spectrum Disorders"[Mesh]) OR "Alcohol-Related Disorders"[Mesh]) OR "Alcohol-Induced Disorders"[Mesh]) AND ("Catechin"[Mesh])). ("Fetal Alcohol Spectrum Disorders"[Mesh]) AND "epigallocatechin gallate" [Supplementary Concept]. Filters: Article types: classical article, clinical study, clinical trial, comparative study, controlled clinical trial, journal article, multicenter study, observational study, randomized controlled trial; Publication dates: 2010-2021(included); Species: humans, mice, rat; Languages: English.

**Section 3.4.** (("epigallocatechin gallate"[Supplementary Concept] OR "epigallocatechin gallate"[All Fields] OR ("tea"[MeSH Terms] OR "tea"[All Fields] OR ("green"[All Fields] AND "tea"[All Fields]) OR "green tea"[All Fields])) AND ("down syndrome"[MeSH Terms] OR ("down"[All Fields] AND "syndrome"[All Fields]) OR "down syndrome"[All Fields])) AND (2010:2021[pdat]). Filters: Article types: classical article, clinical study, clinical trial, comparative study, controlled clinical trial, journal article, multicenter study, observational study, randomized controlled trial. Publication dates: 2010-2021(included); Species: humans, mouse, rat; Languages: English.

**Section 3.5.** Search: ("health"[MeSH Terms] OR "health"[All Fields] OR "health's"[All Fields] OR "healthful"[All Fields] OR "healthfulness"[All Fields] OR "healths"[All Fields]); ("healthies"[All Fields] OR "healthy"[All Fields]); ("catechin"[MeSH Terms] OR "catechin"[All Fields] OR "catechins"[All Fields] OR "catechine"[All Fields] OR "catechines"[All Fields]). ("neurology"[MeSH Terms] OR "neurology"[All Fields] OR "neurology's"[All Fields]); ("mental"[All Fields] OR "mentalities"[All Fields] OR "mentality"[All Fields] OR "mentalization"[MeSH Terms] OR "mentalization"[All Fields] OR "mentalizing"[All Fields] OR "mentalize"[All Fields] OR "mentalized"[All Fields] OR "mentally"[All Fields]); ("cognition"[MeSH Terms] OR "cognition"[All Fields] OR "cognitions"[All Fields] OR "cognitive"[All Fields] OR "cognitively"[All Fields] OR "cognitives"[All Fields]). Filters: Article types: classical article, clinical study, clinical trial, comparative study, controlled clinical trial, journal article, multicenter study, observational study, randomized controlled trial. Publication dates: 2010-2021(included); Species: humans; Languages: English.

## Supplementary tables

**Table S1.** Summary of the Grading of Recommendation, Assessment, Development, and Evaluation approach (GRADE) evidence profile for neurodegenerative diseases.

| No. of Studies                                                                                                                          | Design                          | Quality Assessment      |                          |                                     |                                       | No. of Subjects               |                                                              | Effect                                                                                                                                                |          | Quality      | Importance     |
|-----------------------------------------------------------------------------------------------------------------------------------------|---------------------------------|-------------------------|--------------------------|-------------------------------------|---------------------------------------|-------------------------------|--------------------------------------------------------------|-------------------------------------------------------------------------------------------------------------------------------------------------------|----------|--------------|----------------|
|                                                                                                                                         |                                 | Risk of Bias            | Inconsistency            | Indirectness                        | Imprecision                           | No. of Patients               | Control                                                      | Relative (95% CI)                                                                                                                                     | Absolute |              |                |
| Huntington disease                                                                                                                      |                                 |                         |                          |                                     |                                       |                               |                                                              |                                                                                                                                                       |          |              |                |
| Beasley et al., 2019 [1], Varga et al., 2018 [2], Ehrnhoefer et al., 2006 [3]: Ability of EGCG to modify htt aggregation (no follow-up) |                                 |                         |                          |                                     |                                       |                               |                                                              |                                                                                                                                                       |          |              |                |
| 3                                                                                                                                       | Experimental                    | No serious risk of bias | No serious inconsistency | No serious indirectness             | No serious imprecision                | In vitro or Drosophila models |                                                              | EGCG acted as a potent inhibitor of fibril formation ( $p < 0.05$ )                                                                                   |          | Low ++       | Important      |
| Multiple sclerosis                                                                                                                      |                                 |                         |                          |                                     |                                       |                               |                                                              |                                                                                                                                                       |          |              |                |
| Mähler et al., 2015 [94]: Metabolic response to EGCG in MS (12 weeks of follow-up)                                                      |                                 |                         |                          |                                     |                                       |                               |                                                              |                                                                                                                                                       |          |              |                |
| 1                                                                                                                                       | DBPC crossover                  | No serious risk of bias | No serious inconsistency | Indirectness (subrogated variables) | Serious imprecision (low sample size) | 18                            | 18                                                           | Working efficiency: placebo: 20 +/-3<br>EGCG: 25 +/-6 ( $p = 0.004$ )<br>Postprandial FAOx: placebo: 8.3 +/-4.3<br>EGCG: 8.6 +/-5.0 (sex differences) |          | Low ++       | Important      |
| Mossakowski et al., 2015 [93]: Tracking sources of oxidative stress during chronic neuroinflammation (no follow-up)                     |                                 |                         |                          |                                     |                                       |                               |                                                              |                                                                                                                                                       |          |              |                |
| 1                                                                                                                                       | RDBPC                           | No serious risk of bias | No serious inconsistency | Indirectness (subrogated variables) | Serious imprecision                   | $n = 6$ RRMS + EGCG + GA      | $n = 6$ RRMS + GA<br>6 RRMS<br>6 CIS<br>6 controls<br>6 SPMS | NOX activity. on CD11b+: Control $3.4 \pm 0.6\%$ . RRMS untreated: $18.3 \pm 2.5\%$ , RRMS + GA: $10.8 \pm 2.8\%$ , RRMS + GA+ EGCG: $6.4 \pm 1.2\%$  |          | Low ++       | Less important |
| Lovera et al., 2012 [96]: Safety and futileness of Polyphenon in MS (Ph1 and Ph2) (six months of follow-up)                             |                                 |                         |                          |                                     |                                       |                               |                                                              |                                                                                                                                                       |          |              |                |
| 1                                                                                                                                       | Ph1: single group<br>Ph2: RDBPC | No serious risk of bias | No serious inconsistency | No serious indirectness             | Serious imprecision                   | Ph1: 10<br>Ph2: 8             | Ph2: 5                                                       | NAA adjusted for creatinine: 10% [3.4%,16.2%]                                                                                                         |          | Moderate +++ | Important      |

|                                                                                                                                   |       |                         |                          |                         |                        |    |    |                                                                            |              |           |
|-----------------------------------------------------------------------------------------------------------------------------------|-------|-------------------------|--------------------------|-------------------------|------------------------|----|----|----------------------------------------------------------------------------|--------------|-----------|
|                                                                                                                                   |       | risk of bias            |                          |                         |                        |    |    | Ph2 was stopped before because 5/7 participants had elevated liver enzymes |              |           |
| <b>Bellmann–Strobl et al., 2021 [4], Rust et al., 2021 [5]: Efficacy and safety of EGCG treatment in MS (36 months follow-up)</b> |       |                         |                          |                         |                        |    |    |                                                                            |              |           |
| 2                                                                                                                                 | RDBPC | No serious risk of bias | No serious inconsistency | No serious indirectness | No serious imprecision | 92 | 91 | No differences on efficacy.<br>No differences on adverse events.           | High<br>++++ | Important |

Abbreviations: EGCG: epigallocatechin-3-gallate; DBPC: Double blind placebo controlled study; Rt-PA: recombinant tissue plasminogen activator; NIHSS: National Institutes of Health stroke scale; OTT: onset-to-treatment time; GA: glatiramer acetate; FAOx: fat oxidation; RDBPC: Randomized double blind placebo controlled study; RRMS: relapsing-remitting multiple sclerosis; CIS: clinically isolated syndrome; SPMS: secondary progressive multiple sclerosis; NOX: nicotinamide adenine dinucleotide phosphate (NADPH) oxidases; EAE: experimental autoimmune encephalomyelitis; PhI: Phase I; PhII: Phase II; NAA: N-acetyl aspartate; MS: multiple sclerosis; HD: Huntington disease; HTT: huntingtin. Quality of evidence grades: high (++++), moderate (+++), low (++).

**Table S2.** Summary of GRADE evidence profile for fetal alcohol spectrum disorders.

| N <sup>o</sup> of studies                                                                                              | Design                                     | Quality Assessment      |                                                          |                                              |                        | No. of Patients |         | Effect                                      |          | Quality    | Importance |
|------------------------------------------------------------------------------------------------------------------------|--------------------------------------------|-------------------------|----------------------------------------------------------|----------------------------------------------|------------------------|-----------------|---------|---------------------------------------------|----------|------------|------------|
|                                                                                                                        |                                            | Risk of Bias            | Inconsistency                                            | Indirectness                                 | Imprecision            | Cases           | Control | Relative (95%CI)                            | Absolute |            |            |
| Long (2010) [6], Almeida (2021) [7]: EGCG and growth restriction prevention (no follow-up)                             |                                            |                         |                                                          |                                              |                        |                 |         |                                             |          |            |            |
| 2                                                                                                                      | Experimental C57BL/6 mouse models of FASD. | No serious risk of bias | Serious inconsistency (assessment of different measures) | No serious indirectness                      | No serious imprecision | 48              | 18      | Fetal growth improvement ( $p < 0.05$ )     |          | Very low + | Important  |
| Long (2010) [6], Tiwari (2010) [8], Almeida (2021) [7]: EGCG effect on oxidative stress (follow-up of variable period) |                                            |                         |                                                          |                                              |                        |                 |         |                                             |          |            |            |
| 3                                                                                                                      | Experimental rodent models of FASD.        | No serious risk of bias | No serious inconsistency                                 | Serious indirectness (different comparisons) | No serious imprecision | 76              | 25      | Oxidative stress improvement ( $p < 0.05$ ) |          | Very low + | Important  |
| Tiwari (2010) [8]: EGCG and apoptosis prevention (28 days follow-up)                                                   |                                            |                         |                                                          |                                              |                        |                 |         |                                             |          |            |            |
| 1                                                                                                                      | Experimental Wistar rat model of FASD.     | No serious risk of bias | No serious inconsistency                                 | No serious indirectness                      | No serious imprecision | 28              | 7       | Apoptosis reduction ( $p < 0.05$ )          |          | Low ++     | Important  |

| Long (2010) [6], Almeida (2021) [7]: EGCG and growth restriction prevention (no follow-up) |                                            |                         |                          |                                              |                        |    |    |                                                                     |            |           |
|--------------------------------------------------------------------------------------------|--------------------------------------------|-------------------------|--------------------------|----------------------------------------------|------------------------|----|----|---------------------------------------------------------------------|------------|-----------|
| 2                                                                                          | Experimental C57BL/6 mouse models of FASD. | No serious risk of bias | No serious inconsistency | Serious indirectness (different comparisons) | No serious imprecision | 48 | 18 | Improvement in neural maturation and differentiation ( $p < 0.05$ ) | Very low + | Important |
| Tiwari (2010) [8]: EGCG prevention on cognitive impairment (28 days follow-up)             |                                            |                         |                          |                                              |                        |    |    |                                                                     |            |           |
| 1                                                                                          | Experimental Wistar rat model of FASD.     | No serious risk of bias | No serious inconsistency | No serious indirectness                      | No serious imprecision | 28 | 7  | Cognitive improvement ( $p < 0.05$ )                                | Low ++     | Important |

Abbreviations. EGCG: epigallocatechin-3-gallate. FASD: fetal alcohol spectrum disorders. Quality of evidence grades: low (++), very low (+).

Table S3. Summary of GRADE evidence profile for Down syndrome.

| N° of studies                                                                                                                                                                                                                                                                                                        | Design                                                                        | Quality Assessment               |                          |                         |                        | No. of Patients                           |              | Effect                                                                                                                                            |          | Quality      | Importance |
|----------------------------------------------------------------------------------------------------------------------------------------------------------------------------------------------------------------------------------------------------------------------------------------------------------------------|-------------------------------------------------------------------------------|----------------------------------|--------------------------|-------------------------|------------------------|-------------------------------------------|--------------|---------------------------------------------------------------------------------------------------------------------------------------------------|----------|--------------|------------|
|                                                                                                                                                                                                                                                                                                                      |                                                                               | Risk of Bias                     | Inconsistency            | Indirectness            | Imprecision            | Cases                                     | Control      | Relative (95%CI)                                                                                                                                  | Absolute |              |            |
| Gu et al., 2020 [9], Catuara–Solarz et al., 2016 [10], Valenti et al., 2016 [11], Valenti et al., 2013 [12], Souchet et al., 2015 [13], De Toma et al., 2019 [14], De Toma et al., 2020 [15], Catuara et al., 2015 [16], Stagni et al., 2016 [17]: Ability of EGCG to restore intellectual disability (no follow-up) |                                                                               |                                  |                          |                         |                        |                                           |              |                                                                                                                                                   |          |              |            |
| 9                                                                                                                                                                                                                                                                                                                    | Experimental Ts65Dn or overexpress DYRK1A mouse models of DS or cell cultures | No serious risk of bias          | No serious inconsistency | No serious indirectness | No serious imprecision |                                           |              | EGCG treatment derived cognitive improvements linked to neuromodulatory effects at the hippocampus ( $p < 0.05$ )                                 | -        | Low ++       | Important  |
| Goodlett et al., 2020 [18], Stringer et al., 2015 [19], Stringer et al., 2017 [20]: Ability of EGCG to restore intellectual disability (no follow-up)                                                                                                                                                                |                                                                               |                                  |                          |                         |                        |                                           |              |                                                                                                                                                   |          |              |            |
| 3                                                                                                                                                                                                                                                                                                                    | Experimental Ts65Dn mouse models of DS                                        | No serious risk of bias          | No serious inconsistency | No serious indirectness | No serious imprecision |                                           |              | EGCG was not found to produce beneficial therapeutic effects on behavior, learning, and memory ( $p < 0.05$ )                                     | -        | Low ++       | Important  |
| de La Torre et al., 2014 [21], de La Torre et al., 2016 [22]: Ability of EGCG to restore intellectual disability (12 + six months of follow-up)                                                                                                                                                                      |                                                                               |                                  |                          |                         |                        |                                           |              |                                                                                                                                                   |          |              |            |
| 2                                                                                                                                                                                                                                                                                                                    | RDBPC                                                                         | No serious risk of bias          | No serious inconsistency | No serious indirectness | No serious imprecision | 43 DS                                     | 41 controls  | Participants treated with EGCG and cognitive training had significantly higher scores in memory, learning, and behavior subdomains ( $p < 0.05$ ) | -        | High ++++    | Critical   |
| Starbuck et al., 2021 [23]: Therapeutic potential of EGCG for ameliorating facial dysmorphologies associated with DS (follow-up of variable periods)                                                                                                                                                                 |                                                                               |                                  |                          |                         |                        |                                           |              |                                                                                                                                                   |          |              |            |
| 1                                                                                                                                                                                                                                                                                                                    | Case control study                                                            | Risk of bias for small n treated | No serious inconsistency | No serious indirectness | No serious imprecision | 63 DS, four mosaics, 13 treated with EGCG | 207 euploids | EGCG modulates facial development with dose-dependent effects ( $p < 0.05$ )                                                                      | -        | Moderate +++ | Important  |

with  
EGCG

Abbreviations. EGCG: epigallocatechin,-3-gallate. DS: Down syndrome. RDBPC: randomized, double blind, placebo-controlled study. Quality of evidence grades: high (++++), moderate (+++), low (++).

**Table S4.** Summary of GRADE evidence profile on the neurologic effects of catechins in healthy populations.

| Quality Assessment                                                                                                                                |                |                         |                          |                         |                        | No. of Patients | Effect            | Quality                                                                                                                                                                                                                                                                                                                             | Importance |        |           |
|---------------------------------------------------------------------------------------------------------------------------------------------------|----------------|-------------------------|--------------------------|-------------------------|------------------------|-----------------|-------------------|-------------------------------------------------------------------------------------------------------------------------------------------------------------------------------------------------------------------------------------------------------------------------------------------------------------------------------------|------------|--------|-----------|
| Nº of Studies                                                                                                                                     | Design         | Risk of Bias            | Inconsistency            | Indirectness            | Imprecision            | Control         | Relative (95% CI) | Absolute                                                                                                                                                                                                                                                                                                                            |            |        |           |
| Kesse–Guyot et al., 2012 [24], Biasibetti et al., 2013 [25]: Association between polyphenol intake and cognitive function (13 years of follow-up) |                |                         |                          |                         |                        |                 |                   |                                                                                                                                                                                                                                                                                                                                     |            |        |           |
| 2                                                                                                                                                 | Observational, | No serious risk of bias | No serious inconsistency | No serious indirectness | No serious imprecision | 3382            | -                 | Associations between quartiles of catechin intakes and language and verbal memory: Q1: 48.1 +/-0.7, Q2: 49.3 +/-0.7, Q3: 49.4 +/-0.7, Q4: 50.1 +/-0.7 $p = 0.001$ ; executive function: Q1: 51.3 +/-0.7, Q2: 51.0 +/-0.7, Q3: 50.1 +/-0.7, Q4: 49.9 +/-0.7, $p = 0.01$ ; cognitive status: Q4 vs. Q1: OR = 0.24, 95% CI: 0.08, 0.72 | -          | Low ++ | Important |
| Mohamed S, et al., (2013) [26]: Cognitive effects of OPLE (two months follow up)                                                                  |                |                         |                          |                         |                        |                 |                   |                                                                                                                                                                                                                                                                                                                                     |            |        |           |
| 1                                                                                                                                                 | RDBPC          | No serious              | No serious inconsistency | Serious indirectness    | Serious imprecision    | 15              | 15                | Short-term memory ( $p <$                                                                                                                                                                                                                                                                                                           | -          | Low ++ | Important |

|                                                                                                                                                                                              |                       | risk of bias |                          | (subrogated variables, selected population) | (low sample size)      |     |     | 0.001), spatial visualization ability and processing speed ( $p < 0.05$ ) improved after of OPLE.                                                                                                                                                                                                  |   |              |           |
|----------------------------------------------------------------------------------------------------------------------------------------------------------------------------------------------|-----------------------|--------------|--------------------------|---------------------------------------------|------------------------|-----|-----|----------------------------------------------------------------------------------------------------------------------------------------------------------------------------------------------------------------------------------------------------------------------------------------------------|---|--------------|-----------|
| <b>Scholey A, et al., (2012)[27]; Emma L, et al., (2012) [28], Dietz C, et al.,(2017)[29], Liu Y, et al., (2018) [30]: Effect of EGCG, green tea extract or matcha tea on brain and mood</b> |                       |              |                          |                                             |                        |     |     |                                                                                                                                                                                                                                                                                                    |   |              |           |
| 4                                                                                                                                                                                            | RSBPC crossover trial | No serious   | No Serious inconsistency | Serious indirectness (subrogated variables) | No serious imprecision | 105 | 105 | No differences on mood. Reduction in oxy-Hb only with 135 mg of EGCG ( $p < 0.001$ ). EEG: increase in alpha, beta and theta activity with EGCG. Matcha: improvement in basic attention and psychomotor speed response. Decaffeinated GTE improved reading span only in older women ( $p = 0.04$ ) | - | Moderate +++ | Important |
| <b>Ide et al., (2016) [31], Sakurai et al., (2020) [32], Baba et al., (2020) [33]: Green tea intake on cognitive dysfunction (one year of follow-up)</b>                                     |                       |              |                          |                                             |                        |     |     |                                                                                                                                                                                                                                                                                                    |   |              |           |
| 3                                                                                                                                                                                            | RDBPC                 | No serious   | No serious inconsistency | No serious indirectness                     | No serious imprecision | 71  | 68  | Global cognitive and memory                                                                                                                                                                                                                                                                        | - | High ++++    | Important |

---

risk of  
bias

function tests:  
no significant  
differences.

---

Abbreviations: Q: quartile, OPLE: alcoholic oil palm leaves extract, EGCG: epigallocatechin-gallate, EEG: electroencephalogram, GTE: green tea extract, RDBPC: randomized, double blind, placebo-controlled study, RSBPC: randomized, single blind, placebo-controlled study. Quality of evidence grades: high (++++), moderate (+++), low (++).

## References

1. Beasley M, Stonebraker AR, Hasan I, Kapp KL, Liang BJ, Agarwal G, et al. Lipid membranes influence the ability of small molecules to inhibit huntingtin fibrillization. *Biochemistry*. 2019;58(43):4361–73 . DOI: 10.1021/acs.biochem.9b00739.Lipid.
2. Varga J, Dér NP, Zsindely N, Bodai L. Green tea infusion alleviates neurodegeneration induced by mutant Huntingtin in *Drosophila*. *Nutr Neurosci*. 2020;23(3):183–9 . DOI: 10.1080/1028415X.2018.1484021. PMID: 29973113
3. Ehrnhoefer DE, Duennwald M, Markovic P, Wacker JL, Engemann S, Roark M, et al. Green tea (-)-epigallocatechin-gallate modulates early events in huntingtin misfolding and reduces toxicity in Huntington's disease models. *Hum Mol Genet*. 2006;15(18):2743–51 . DOI: 10.1093/hmg/ddl210. PMID: 16893904
4. Judith Bellmann-Strobl, Friedemann Paul, Jens Wuerfel, Jan Dörr, Carmen Infante-Duarte, Elmira Heidrich, Benedict Körtgen, Alexander Brandt, Caspar Pfüller, Helena Radbruch, Rebekka Rust, Volker Siffrin, Orhan Aktas, Christoph Heesen, Jürgen Faiss, Fr and FZ. Epigallocatechin Gallate in Relapsing-Remitting Multiple Sclerosis. A randomized, placebo-controlled trial. *Neurol Neuroimmunol neuroinflammation*. 2021;8(3) . DOI: 10.1212/NXI.0000000000000981.
5. Rust R, Chien C, Scheel M, Brandt AU, Dörr J, Wuerfel J, et al. Epigallocatechin Gallate in Progressive MS: A Randomized, Placebo-Controlled Trial. *Neurol Neuroimmunol neuroinflammation*. 2021;8(3) . DOI: 10.1212/NXI.0000000000000964. PMID: 33622766
6. Long L, Li Y, Wang YD, He QY, Li M, Cai XD, et al. The preventive effect of oral EGCG in a fetal alcohol spectrum disorder mouse model. *Alcohol Clin Exp Res*. 2010;34(11):1929–36 . DOI: 10.1111/j.1530-0277.2010.01282.x. PMID: 20659071
7. Almeida-Toledano L, Andreu-Fernández V, Aras-López R, García-Algar Ó, Martínez L, Gómez-Roig MD. Epigallocatechin gallate ameliorates the effects of prenatal alcohol exposure in a fetal alcohol spectrum disorder-like mouse model. *Int J Mol Sci*. 2021;22(2):1–24 . DOI: 10.3390/ijms22020715. PMID: 33450816
8. Tiwari V, Kuhad A, Chopra K. Epigallocatechin-3-gallate ameliorates alcohol-induced cognitive dysfunctions and apoptotic neurodegeneration in the developing rat brain. *Int J Neuropsychopharmacol*. 2010;13(8):1053–66 . DOI: 10.1017/S146114571000060X. PMID: 20529413
9. Gu Y, Moroy G, Paul JL, Rebillat AS, Dierssen M, de la Torre R, et al. Molecular rescue of DYRK1A overexpression alterations in mice with fontup® dietary supplement: Role of green tea catechins. *Int J Mol Sci*. 2020;21(4) . DOI: 10.3390/ijms21041404. PMID: 32092951
10. Catuara-Solarz S, Espinosa-Carrasco J, Erb I, Langohr K, Gonzalez JR, Notredame C, et al. Combined Treatment With Environmental Enrichment and (-)-Epigallocatechin-3-Gallate Ameliorates Learning Deficits and Hippocampal Alterations in a Mouse Model of Down Syndrome. *eNeuro*. 2016;3(5) . DOI: 10.1523/ENEURO.0103-16.2016. PMID: 27844057
11. Valenti D, de Bari L, de Rasmio D, Signorile A, Henrion-Cauvé A, Contestabile A, et al. The polyphenols resveratrol and epigallocatechin-3-gallate restore the severe impairment of mitochondria in hippocampal progenitor cells from a Down syndrome mouse model. *Biochim Biophys Acta - Mol Basis Dis*. 2016;1862(6):1093–104 . DOI: 10.1016/j.bbadis.2016.03.003.
12. Valenti D, De Rasmio D, Signorile A, Rossi L, de Bari L, Scala I, et al. Epigallocatechin-3-gallate prevents oxidative phosphorylation deficit and promotes mitochondrial biogenesis in human cells from subjects with Down's syndrome. *Biochim Biophys Acta - Mol Basis Dis*. 2013;1832(4):542–52 . DOI: 10.1016/j.bbadis.2012.12.011. PMID: 23291000
13. Souchet B, Guedj F, Penke-Verdier Z, Daubigney F, Duchon A, Herault Y, et al. Pharmacological correction of excitation/inhibition imbalance in down syndrome mouse models. *Front Behav Neurosci*. 2015;9(OCTOBER) . DOI: 10.3389/fnbeh.2015.00267.
14. De Toma I, Ortega M, Aloy P, Sabidó E, Dierssen M. DYRK1A Overexpression Alters Cognition and Neural-Related Proteomic Pathways in the Hippocampus That Are Rescued by Green Tea Extract and/or Environmental Enrichment. *Front Mol Neurosci*. 2019;12(November):1–22 . DOI: 10.3389/fnmol.2019.00272.
15. De Toma I, Ortega M, Catuara-Solarz S, Sierra C, Sabidó E, Dierssen M. Re-establishment of the epigenetic state and rescue of kinome deregulation in Ts65Dn mice upon treatment with green tea extract and environmental enrichment. *Sci Rep*. 2020;10(1) . DOI: 10.1038/s41598-020-72625-z. PMID: 32994493
16. Catuara-Solarz S, Espinosa-Carrasco J, Erb I, Langohr K, Notredame C, Gonzalez JR, et al. Principal component analysis of the effects of environmental enrichment and (-)-epigallocatechin-3-gallate on age-associated learning deficits in a mouse model of down

syndrome. *Front Behav Neurosci.* 2015;9(DEC):1–14 . DOI: 10.3389/fnbeh.2015.00330. PMID: 26696850

17. Stagni F, Giacomini A, Emili M, Trazzi S, Guidi S, Sassi M, et al. Short- and long-term effects of neonatal pharmacotherapy with epigallocatechin-3-gallate on hippocampal development in the Ts65Dn mouse model of Down syndrome. *Neuroscience.* 2016;333:277–301 . DOI: 10.1016/j.neuroscience.2016.07.031. PMID: 27457036
18. Goodlett CR, Stringer M, LaCombe J, Patel R, Wallace JM, Roper RJ. Evaluation of the therapeutic potential of Epigallocatechin-3-gallate (EGCG) via oral gavage in young adult Down syndrome mice. *Sci Rep.* 2020;10(1):1–17 . DOI: 10.1038/s41598-020-67133-z. PMID: 32591597
19. Stringer M, Abeyssekera I, Dria KJ, Roper RJ, Goodlett CR. Low dose EGCG treatment beginning in adolescence does not improve cognitive impairment in a Down syndrome mouse model. *Pharmacol Biochem Behav.* 2015;138:70–9 . DOI: 10.1016/j.pbb.2015.09.002. PMID: 26363314
20. Stringer M, Abeyssekera I, Thomas J, Lacombe J, Stewart RJ, Dria KJ, et al. Epigallocatechin-3-gallate (EGCG) consumption in the Ts65Dn model of Down syndrome fails to improve behavioral deficits and is detrimental to skeletal phenotypes. *Physiol Behav.* 2017;177:230–41 . DOI: 10.1016/j.physbeh.2017.05.003. Epigallocatechin-3-gallate.
21. De la Torre R, De Sola S, Pons M, Duchon A, de Lagran MM, Farré M, et al. Epigallocatechin-3-gallate, a DYRK1A inhibitor, rescues cognitive deficits in Down syndrome mouse models and in humans. *Mol Nutr Food Res.* 2014;58(2):278–88 . DOI: 10.1002/mnfr.201300325. PMID: 24039182
22. de la Torre R, de Sola S, Hernandez G, Farré M, Pujol J, Rodriguez J, et al. Safety and efficacy of cognitive training plus epigallocatechin-3-gallate in young adults with Down's syndrome (TESDAD): A double-blind, randomised, placebo-controlled, phase 2 trial. *Lancet Neurol.* 2016;15(8):801–10 . DOI: 10.1016/S1474-4422(16)30034-5. PMID: 27302362
23. Starbuck JM, Llambrich S, González R, Albaigès J, Sarlé A, Wouters J, et al. Green tea extracts containing epigallocatechin-3-gallate modulate facial development in Down syndrome. *Sci Rep.* 2021;11(1):1–13 . DOI: 10.1038/s41598-021-83757-1.
24. Kesse-Guyot E, Fezeu L, Andreeva VA, Touvier M, Scalbert A, Hercberg S, et al. Total and specific polyphenol intakes in midlife are associated with cognitive function measured 13 years later. *J Nutr.* 2012;142(1):76–83 . DOI: 10.3945/jn.111.144428. PMID: 22090468
25. Biasibetti R, Tramontina AC, Costa AP, Dutra MF, Quincozes-Santos A, Nardin P, et al. Green tea (-)epigallocatechin-3-gallate reverses oxidative stress and reduces acetylcholinesterase activity in a streptozotocin-induced model of dementia. *Behav Brain Res.* 2013;236(1):186–93 . DOI: 10.1016/j.bbr.2012.08.039. PMID: 22964138
26. Mohamed S, Lee Ming T, Jaffri JM. Cognitive enhancement and neuroprotection by catechin-rich oil palm leaf extract supplement. *J Sci Food Agric.* 2013;93(4):819–27 . DOI: 10.1002/jsfa.5802. PMID: 23001939
27. Scholey A, Downey LA, Ciorciari J, Pipingas A, Nolidin K, Finn M, et al. Acute neurocognitive effects of epigallocatechin gallate (EGCG). *Appetite.* 2012;58(2):767–70 . DOI: 10.1016/j.appet.2011.11.016. PMID: 22127270
28. Emma L. Wightman, Crystal F. Haskell, Joanne S. Forster RCV and DOK. Epigallocatechin gallate, cerebral blood flow parameters, cognitive performance and mood in healthy humans: a double-blind, placebo-controlled, crossover investigation. *Hum Psychopharmacol.* 2012;27:177–86 . DOI: 10.1002/hup. PMID: 7929019
29. Dietz C, Dekker M, Piqueras-Fiszman B. An intervention study on the effect of matcha tea, in drink and snack bar formats, on mood and cognitive performance. *Food Res Int.* 2017;99:72–83 . DOI: 10.1016/j.foodres.2017.05.002. PMID: 28784536
30. Liu Y, Fly AD, Wang Z, Klaunig JE. The Effects of Green Tea Extract on Working Memory in Healthy Women. *J Nutr Heal Aging.* 2018;22(3):446–50 . DOI: 10.1007/s12603-017-0962-8. PMID: 29484360
31. Ide K, Yamada H, Takuma N, Kawasaki Y, Harada S, Nakase J, et al. Effects of green tea consumption on cognitive dysfunction in an elderly population: A randomized placebo-controlled study. *Nutr J.* 2016;15(1):1–9 . DOI: 10.1186/s12937-016-0168-7. PMID: 27142448
32. Sakurai K, Shen C, Ezaki Y, Inamura N, Fukushima Y, Masuoka N, et al. Effects of matcha green tea powder on cognitive functions of community-dwelling elderly individuals. *Nutrients.* 2020;12(12):1–15 . DOI: 10.3390/nu12123639. PMID: 33256220
33. Yoshitake Baba, Shun Inagaki, Sae Nakagawa, Toshiyuki Kaneko MK and TT. Effect of Daily Intake of Green Tea Catechins on Cognitive Function in Middle-Aged and Older Subjects: A Randomized, Placebo-Controlled Study. *Molecules.* 2020;24(4265) . DOI:

10.3390/molecules25184265.
